# Supplementary material
Source: publisher figshare collection journal article supplement (https://tandf.figshare.com/ndownloader/files/13574750)
Supplement: Supplementary file 1 [file 13574750]

## Sheet: Sheet1
Substance	Product Code
Etizolam	6823698
Adinazolam	8006242
Clonazolam	8006250
Cloniprazepam	8006325
Diclazepam	8006292
Flubromazepam	8006300
Flubromazolam	8006052
Meclonazepam	8006333
Nifoxipam	8006234
Norflurazepam	8006359
Pyrazolam	8006317
